# Supplementary material for: Synthesis and supramolecular organization of the iodide and triiodides of a polycyclic adamantane-based diammonium cation: the effects of hydrogen bonds and weak I⋯I interactions
Source: Royal Society of Chemistry journal article supplement (doi:10.1039/d0ce01730b), 2021-01-01
Supplement: d0ce01730b1.pdf [file d0ce01730b1.pdf]

## Electronic Supplementary Information

### Synthesis and Supramolecular Organization of Iodide and Triiodide of a Polycyclic Adamantane-Based Diammonium Cation: The Effect of Hydrogen Bonds and Weak I···I Interactions

Ivan V. Mezentsev-Cherkess,<sup>a</sup> Tatiana A. Shestimerova,<sup>a</sup> Aleksei V. Medved'ko,<sup>b</sup> Mikhail A. Kalinin,<sup>a</sup> Alexey N. Kuznetsov,<sup>a,c</sup> Zheng Wei,<sup>d</sup> Evgeny V. Dikarev,<sup>d</sup> Sergey Z. Vatsadze,<sup>a,b,†</sup> and Andrei V. Shevelkov<sup>a,†</sup>

<sup>a</sup> Department of Chemistry, Lomonosov Moscow State University, 119991 Moscow, Russia

<sup>b</sup> N.D. Zelinsky Institute of Organic Chemistry RAS, 119991 Moscow, Russia

<sup>c</sup> N. S. Kurnakov Institute of General and Inorganic Chemistry RAS, 119991 Moscow, Russia

<sup>d</sup> Department of Chemistry, University at Albany, SUNY, Albany New York 12222, United States

† Authors to whom correspondence should be addressed. E-mail: [svz@org.chem.msu.ru](mailto:svz@org.chem.msu.ru) (SZV); [shev@inorg.chem.msu.ru](mailto:shev@inorg.chem.msu.ru) (AVS)

## Table of Contents

|                                                                                                                                                                                            |     |
|--------------------------------------------------------------------------------------------------------------------------------------------------------------------------------------------|-----|
| <b>Table S1.</b> Geometry of 1,3-Diazaadamantanes from the CSD Database.....                                                                                                               | S1  |
| <b>Table S2.</b> Crystallographic Data and Structure Refinement Parameters for the Powder Sample of Compound <b>2</b> .....                                                                | S2  |
| <b>Table S3.</b> Selected Interatomic Distances and Angles in the Cations.....                                                                                                             | S3  |
| <b>Figure S1.</b> Powder X-ray diffraction pattern and Rietveld refinement for compound <b>2</b> .....                                                                                     | S6  |
| <b>Figure S2.</b> Powder X-ray diffraction pattern for compound <b>1</b> .....                                                                                                             | S6  |
| <b>Figure S3.</b> Powder X-ray diffraction pattern for compound <b>3</b> .....                                                                                                             | S7  |
| <b>Figure S4.</b> TGA diagram for compound <b>1</b> .....                                                                                                                                  | S8  |
| <b>Figure S5.</b> TGA diagram for compound <b>2</b> .....                                                                                                                                  | S9  |
| <b>Figure S6.</b> TGA diagram for compound <b>3</b> .....                                                                                                                                  | S10 |
| <b>Figure S7.</b> Surrounding of the guest I <sup>-</sup> anions in the crystal structure of <b>1</b> and of I <sub>3</sub> <sup>-</sup> anions in the crystal structure of <b>2</b> ..... | S11 |
| <b>Figure S8.</b> Kubelka-Munk plots for compounds <b>2</b> and <b>3</b> .....                                                                                                             | S12 |
| References.....                                                                                                                                                                            | S13 |

**Table S1.** Geometry of 1,3-Diazaadamantanes from the CSD Database

| No.                   | CSD ref. code | d(N-CH <sub>2</sub> ), Å      | d(N...N), Å  | ∠(N-C-N), deg. | Ref. |
|-----------------------|---------------|-------------------------------|--------------|----------------|------|
| Neutral               |               |                               |              |                |      |
| 1                     | BOGROE        | 1.461; 1.473;<br>1.474; 1.484 | 2.478; 2.483 | 114.14; 115.29 | [1]  |
| 2                     | BOGRUK        | 1.477; 1.490                  | 2.454        | 111.63         | [1]  |
| 3                     | BOQTOQ        | 1.471; 1.472                  | 2.471        | 114.18         | [2]  |
| 4                     | BOVWEP        | 1.471; 1.475                  | 2.478        | 114.55         | [3]  |
| 5                     | FOYRAM        | 1.457; 1.472                  | 2.466        | 114.68         | [4]  |
| 6                     | HULJAZ        | 1.467; 1.472;<br>1.472; 1.488 | 2.461; 2.474 | 114.15; 114.40 | [5]  |
| 7                     | MOWYED        | 1.474; 1.474                  | 2.478        | 114.34         | [6]  |
| 8                     | PUYYAJ        | 1.480; 1.483                  | 2.488        | 114.27         | [7]  |
| 9                     | QIBGOX        | 1.468; 1.476                  | 2.473        | 114.31         | [8]  |
| 10                    | VOGVUL        | 1.466; 1.466                  | 2.457        | 113.88         | [9]  |
| Monoprotonated Cation |               |                               |              |                |      |
| 11                    | ANGSTF        | 1.417; 1.541                  | 2.447        | 111.57         | [10] |
| 12                    | JADVIT        | 1.419; 1.534                  | 2.416        | 109.91         | [11] |
| 13                    | KEQSEG        | 1.472; 1.511                  | 2.446        | 110.19         | [12] |
| 14                    | VOJRUH        | 1.418; 1.426;<br>1.507; 1.511 | 2.293; 2.402 | 109.28; 110.15 | [13] |
| Monomethylated Cation |               |                               |              |                |      |
| 15                    | PAZADO10      | 1.359; 1.593                  | 2.401        | 108.58         | [14] |
| 16                    | VOJRIV        | 1.422; 1.537                  | 2.417        | 110.99         | [13] |
| 17                    | VOJROB        | 1.414; 1.538                  | 2.439        | 109.77         | [13] |
| Dimethylated Dication |               |                               |              |                |      |
| 18                    | JIGJOY        | 1.464; 1.519                  | 2.451        | 109.37         | [15] |

**Table S2.** Crystallographic Data and Structure Refinement Parameters for the Powder Sample of Compound **2**

|                                             |                                                               |
|---------------------------------------------|---------------------------------------------------------------|
| Formula                                     | C <sub>10</sub> H <sub>20</sub> N <sub>2</sub> I <sub>4</sub> |
| formula weight (g·mol <sup>-1</sup> )       | 675.9                                                         |
| crystal system                              | Triclinic                                                     |
| space group                                 | <i>P</i> $\bar{1}$                                            |
| <i>a</i> (Å)                                | 8.15439(9)                                                    |
| <i>b</i> (Å)                                | 8.70457(9)                                                    |
| <i>c</i> (Å)                                | 13.0980(2)                                                    |
| $\alpha$ (°)                                | 95.7365(11)                                                   |
| $\beta$ (°)                                 | 98.8213(9)                                                    |
| $\gamma$ (°)                                | 96.0694(10)                                                   |
| <i>V</i> (Å <sup>3</sup> )                  | 907.15(2)                                                     |
| <i>Z</i>                                    | 2                                                             |
| $\rho_{\text{calcd}}$ (g·cm <sup>-3</sup> ) | 2.4745                                                        |
| temperature (K)                             | 293                                                           |
| radiation, $\lambda$ , Å                    | Cu <i>K</i> $\alpha_1$ , 1.54060                              |
| $2\theta$ range (deg)                       | 4.005–84.915                                                  |
| <i>R</i> <sub>1</sub>                       | 0.0291                                                        |
| <i>wR</i> <sub>2</sub>                      | 0.0387                                                        |
| <i>GoF</i>                                  | 1.42                                                          |
| <i>R</i> <sub>prof</sub>                    | 0.0316                                                        |
| <i>wR</i> <sub>prof</sub>                   | 0.0401                                                        |

**Table S3.** Selected Interatomic Distances and Angles in the Cations

| Atoms                                                                  | Distance, Å | Atoms           | Angle, °   |
|------------------------------------------------------------------------|-------------|-----------------|------------|
| <b>[(C<sub>10</sub>N<sub>2</sub>H<sub>20</sub>)I]I (1)</b>             |             |                 |            |
| N(1)–C(3)                                                              | 1.506(3)    | C(4)–N(1)–C(3)  | 110.84(18) |
| N(1)–C(4)                                                              | 1.483(3)    | C(4)–N(1)–C(6)  | 111.05(19) |
| N(1)–C(6)                                                              | 1.506(3)    | C(6)–N(1)–C(3)  | 111.36(19) |
|                                                                        |             | N(1)–C(3)–C(9)  | 108.52(19) |
|                                                                        |             | N(1)–C(6)–C(2)  | 108.35(19) |
| N(2)–C(1)                                                              | 1.505(3)    | C(1)–N(2)–C(8)  | 111.03(19) |
| N(2)–C(4)                                                              | 1.488(3)    | C(4)–N(2)–C(1)  | 110.25(18) |
| N(2)–C(8)                                                              | 1.509(3)    | C(4)–N(2)–C(8)  | 111.34(19) |
|                                                                        |             | N(2)–C(8)–C(2)  | 108.25(19) |
|                                                                        |             | N(2)–C(1)–C(9)  | 108.99(18) |
| C(2)–C(5)                                                              | 1.538(3)    | C(6)–C(2)–C(5)  | 109.30(19) |
| C(2)–C(6)                                                              | 1.533(3)    | C(6)–C(2)–C(8)  | 108.19(19) |
| C(2)–C(7)                                                              | 1.531(3)    | C(7)–C(2)–C(5)  | 111.5(2)   |
| C(2)–C(8)                                                              | 1.537(3)    | C(7)–C(2)–C(6)  | 109.6(2)   |
|                                                                        |             | C(7)–C(2)–C(8)  | 109.4(2)   |
|                                                                        |             | C(8)–C(2)–C(5)  | 108.84(19) |
| C(9)–C(1)                                                              | 1.530(3)    | C(1)–C(9)–C(3)  | 108.5(2)   |
| C(9)–C(3)                                                              | 1.530(3)    | C(1)–C(9)–C(5)  | 108.6(2)   |
| C(9)–C(5)                                                              | 1.540(3)    | C(3)–C(9)–C(5)  | 108.7(2)   |
| C(9)–C(10)                                                             | 1.524(3)    | C(10)–C(9)–C(1) | 109.1(2)   |
|                                                                        |             | C(10)–C(9)–C(3) | 109.9(2)   |
|                                                                        |             | C(10)–C(9)–C(5) | 112.0(2)   |
|                                                                        |             | C(2)–C(5)–C(9)  | 110.34(19) |
|                                                                        |             | N(1)–C(4)–N(2)  | 107.67(18) |
| <b>[(C<sub>10</sub>N<sub>2</sub>H<sub>20</sub>)I]I<sub>3</sub> (2)</b> |             |                 |            |
| N(1)–C(1)                                                              | 1.43(3)     | C(1)–N(1)–C(5)  | 112(2)     |
| N(1)–C(4)                                                              | 1.54(3)     | C(1)–N(1)–C(4)  | 111.4(19)  |
| N(1)–C(5)                                                              | 1.49(3)     | C(5)–N(1)–C(4)  | 107(2)     |
|                                                                        |             | C(8)–N(2)–C(5)  | 112.6(19)  |
|                                                                        |             | C(8)–N(2)–C(6)  | 110.9(18)  |
| N(2)–C(8)                                                              | 1.48(3)     | C(5)–N(2)–C(6)  | 110(2)     |
| N(2)–C(5)                                                              | 1.45(3)     | N(1)–C(1)–C(7)  | 112(2)     |
| N(2)–C(6)                                                              | 1.57(3)     | C(7)–C(2)–C(3)  | 110(2)     |
|                                                                        |             | C(8)–C(3)–C(4)  | 111.8(19)  |
|                                                                        |             | C(8)–C(3)–C(2)  | 109.5(19)  |
| C(7)–C(1)                                                              | 1.45(3)     | C(4)–C(3)–C(2)  | 107.4(19)  |
| C(7)–C(2)                                                              | 1.51(3)     | C(8)–C(3)–C(9)  | 108(2)     |
| C(7)–C(6)                                                              | 1.51(3)     | C(4)–C(3)–C(9)  | 110(2)     |

|            |         |                 |           |
|------------|---------|-----------------|-----------|
| C(7)–C(10) | 1.51(4) | C(2)–C(3)–C(9)  | 110(2)    |
|            |         | C(3)–C(4)–N(1)  | 107.4(18) |
|            |         | N(1)–C(5)–N(2)  | 107(2)    |
| C(3)–C(2)  | 1.53(3) | C(7)–C(6)–N(2)  | 106.1(19) |
| C(3)–C(4)  | 1.48(3) | C(2)–C(7)–C(6)  | 111(2)    |
| C(3)–C(8)  | 1.49(3) | C(2)–C(7)–C(1)  | 109(2)    |
| C(3)–C(9)  | 1.52(3) | C(6)–C(7)–C(1)  | 107(2)    |
|            |         | C(2)–C(7)–C(10) | 111(2)    |
|            |         | C(6)–C(7)–C(10) | 107(2)    |
|            |         | C(1)–C(7)–C(10) | 112(2)    |
|            |         | N(2)–C(8)–C(3)  | 107.4(19) |

---

**[(C<sub>10</sub>N<sub>2</sub>H<sub>20</sub>)(H<sub>2</sub>O)](I<sub>3</sub>)<sub>2</sub> (3)**

---

|             |           |                   |          |
|-------------|-----------|-------------------|----------|
| N(1)–C(1)   | 1.537(11) | C(5)–N(1)–C(1)    | 109.7(7) |
| N(1)–C(5)   | 1.478(12) | C(5)–N(1)–C(10)   | 109.9(7) |
| N(1)–C(10)  | 1.522(12) | C(10)–N(1)–C(1)   | 110.6(7) |
| N(2)–C(2)   | 1.501(11) | C(2)–N(2)–C(6)    | 111.2(7) |
| N(2)–C(5)   | 1.481(11) | C(5)–N(2)–C(2)    | 110.7(7) |
| N(2)–C(6)   | 1.507(12) | C(5)–N(2)–C(6)    | 110.5(7) |
| C(9)–C(1)   | 1.523(12) | C(1)–C(9)–C(2)    | 108.5(8) |
| C(9)–C(4)   | 1.525(13) | C(1)–C(9)–C(4)    | 109.6(7) |
| C(9)–C(2)   | 1.525(13) | C(1)–C(9)–C(7)    | 108.4(7) |
| C(9)–C(7)   | 1.544(13) | C(2)–C(9)–C(7)    | 109.1(7) |
| C(3)–C(6)   | 1.535(13) | C(6)–C(3)–C(7)    | 109.9(7) |
| C(3)–C(7)   | 1.548(13) | C(10)–C(3)–C(6)   | 108.2(8) |
| C(3)–C(10)  | 1.521(12) | C(10)–C(3)–C(7)   | 107.6(7) |
| C(3)–C(8)   | 1.524(13) | C(10)–C(3)–C(8)   | 108.7(8) |
| N(3)–C(11)  | 1.461(13) | C(11)–N(3)–C(13)  | 110.7(8) |
| N(3)–C(13)  | 1.502(13) | C(11)–N(3)–C(18)  | 110.6(7) |
| N(3)–C(18)  | 1.532(12) | C(13)–N(3)–C(18)  | 111.2(8) |
| N(4)–C(11)  | 1.492(12) | C(11)–N(4)–C(14)  | 110.0(8) |
| N(4)–C(14)  | 1.495(13) | C(11)–N(4)–C(15)  | 110.5(8) |
| N(4)–C(15)  | 1.516(12) | C(14)–N(4)–C(15)  | 112.0(8) |
| C(17)–C(16) | 1.510(14) | C(12)–C(17)–C(14) | 109.6(8) |
| C(17)–C(13) | 1.527(14) | C(13)–C(17)–C(14) | 106.8(8) |
| C(17)–C(14) | 1.543(13) | C(16)–C(17)–C(13) | 109.6(8) |
| C(17)–C(12) | 1.527(14) | C(16)–C(17)–C(14) | 110.0(8) |
| C(20)–C(15) | 1.531(14) | C(15)–C(20)–C(18) | 108.6(8) |
| C(20)–C(16) | 1.521(14) | C(15)–C(20)–C(19) | 110.3(8) |
| C(20)–C(18) | 1.540(14) | C(16)–C(20)–C(15) | 109.9(9) |
| C(20)–C(19) | 1.552(14) | C(16)–C(20)–C(18) | 109.1(8) |
| O(1)–H(1C)  | 0.80(8)   | C(16)–C(20)–C(19) | 111.8(9) |
| O(1)–H(1D)  | 0.87(8)   | C(18)–C(20)–C(19) | 107.0(9) |
| O(2)–H(2C)  | 0.91(8)   | H(1C)–O(1)–H(1D)  | 119(10)  |

---

---

|            |         |                   |          |
|------------|---------|-------------------|----------|
| O(2)–H(2D) | 0.93(8) | H(2C)–O(2)–H(2D)  | 114(10)  |
|            |         | N(1)–C(5)–N(2)    | 109.7(8) |
|            |         | C(9)–C(1)–N(1)    | 108.7(7) |
|            |         | N(2)–C(2)–C(9)    | 109.4(7) |
|            |         | N(2)–C(6)–C(3)    | 109.2(7) |
|            |         | C(9)–C(7)–C(3)    | 108.4(7) |
|            |         | C(3)–C(10)–N(1)   | 110.5(7) |
|            |         | N(3)–C(11)–N(4)   | 108.5(8) |
|            |         | N(3)–C(13)–C(17)  | 108.7(8) |
|            |         | N(4)–C(14)–C(17)  | 108.3(8) |
|            |         | N(4)–C(15)–C(20)  | 107.6(8) |
|            |         | C(17)–C(16)–C(20) | 110.8(8) |
|            |         | N(3)–C(18)–C(20)  | 107.1(8) |

---

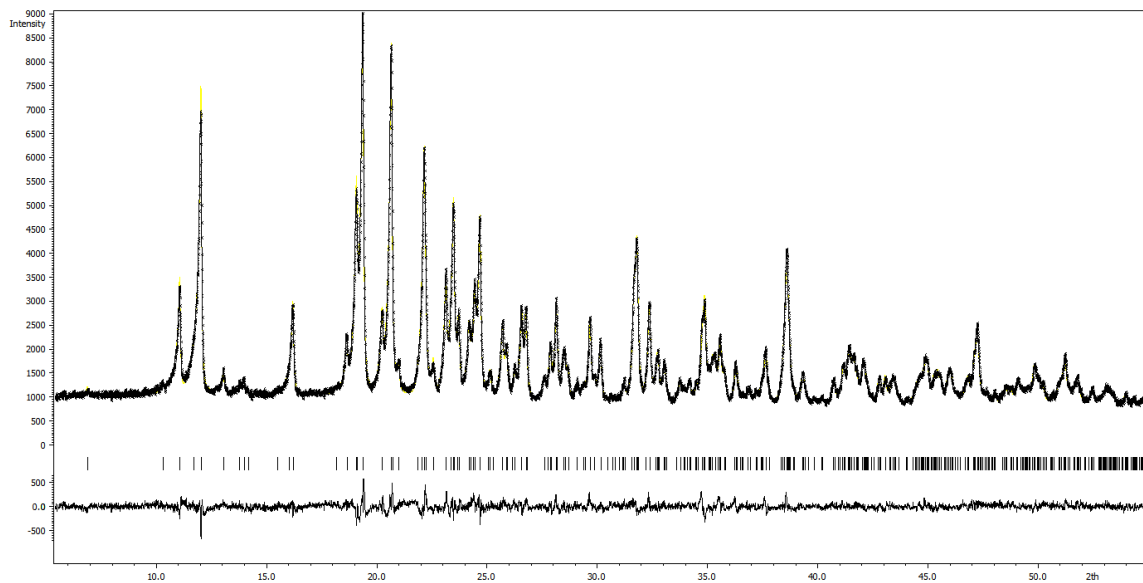

**Figure S1.** Powder X-ray diffraction pattern and Rietveld refinement for compound **2**. The upper curve represents the experimental diffraction pattern, the ticks show calculated peak positions, and the lower curve is the difference between the experimental and calculated patterns. The most significant area from 5 to 55° 2θ is shown.

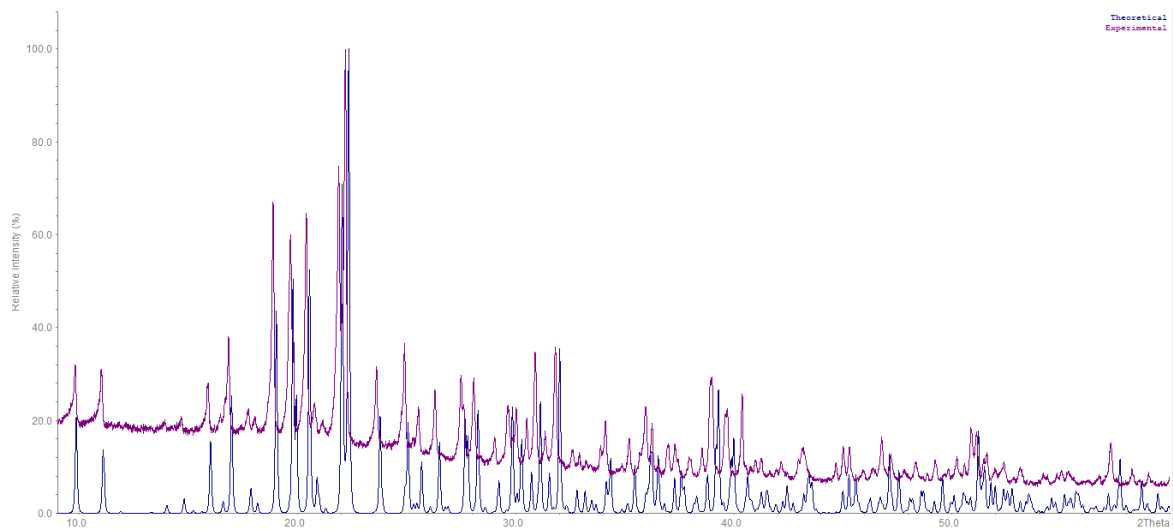

**Figure S2.** Powder X-ray diffraction pattern for compound **1**. Shown are experimental (purple) and simulated from the crystal data patterns. The most significant area from 8 to 60° 2θ is shown.



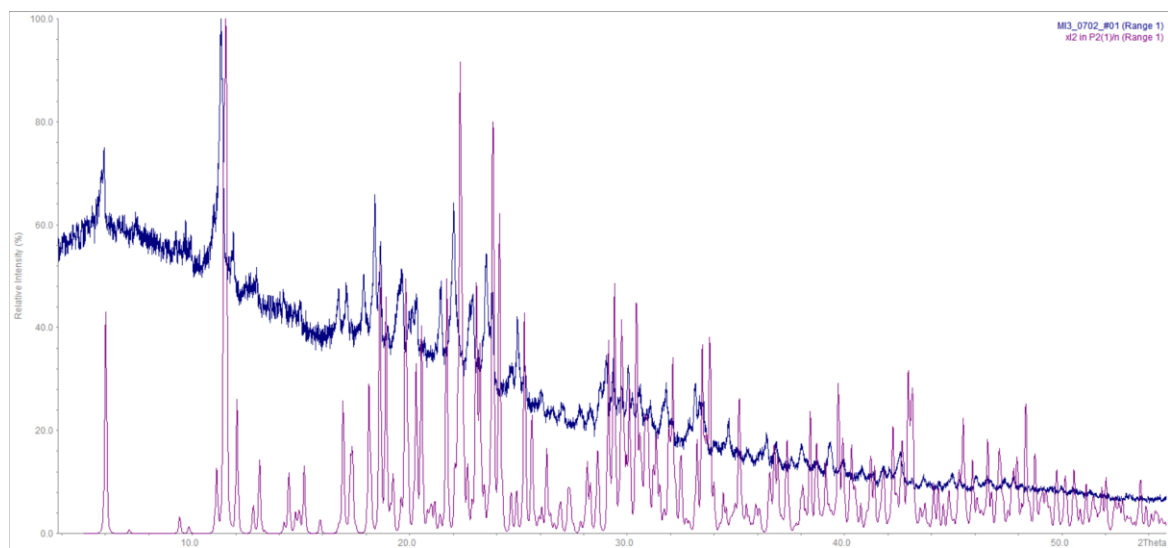

**Figure S3.** Powder X-ray diffraction pattern for compound **3** Shown are experimental (purple) and simulated from the crystal data patterns. The most significant area from 5 to 55° 2theta is shown.

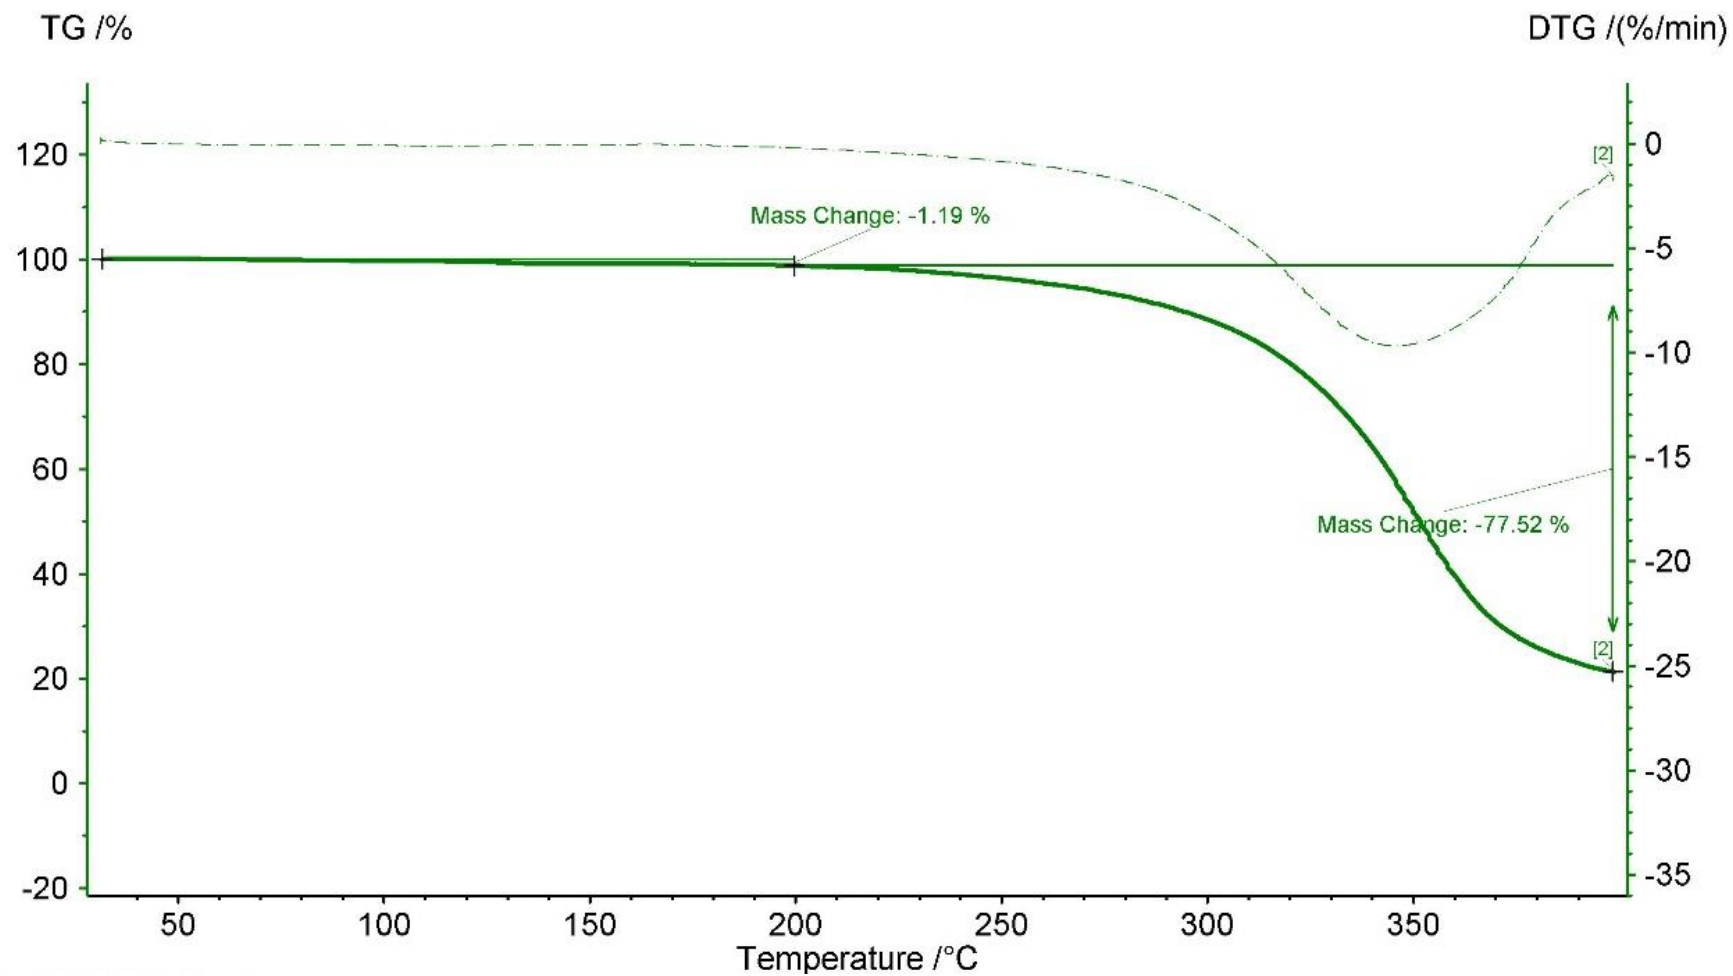

Figure S4. TGA diagram for compound 1.

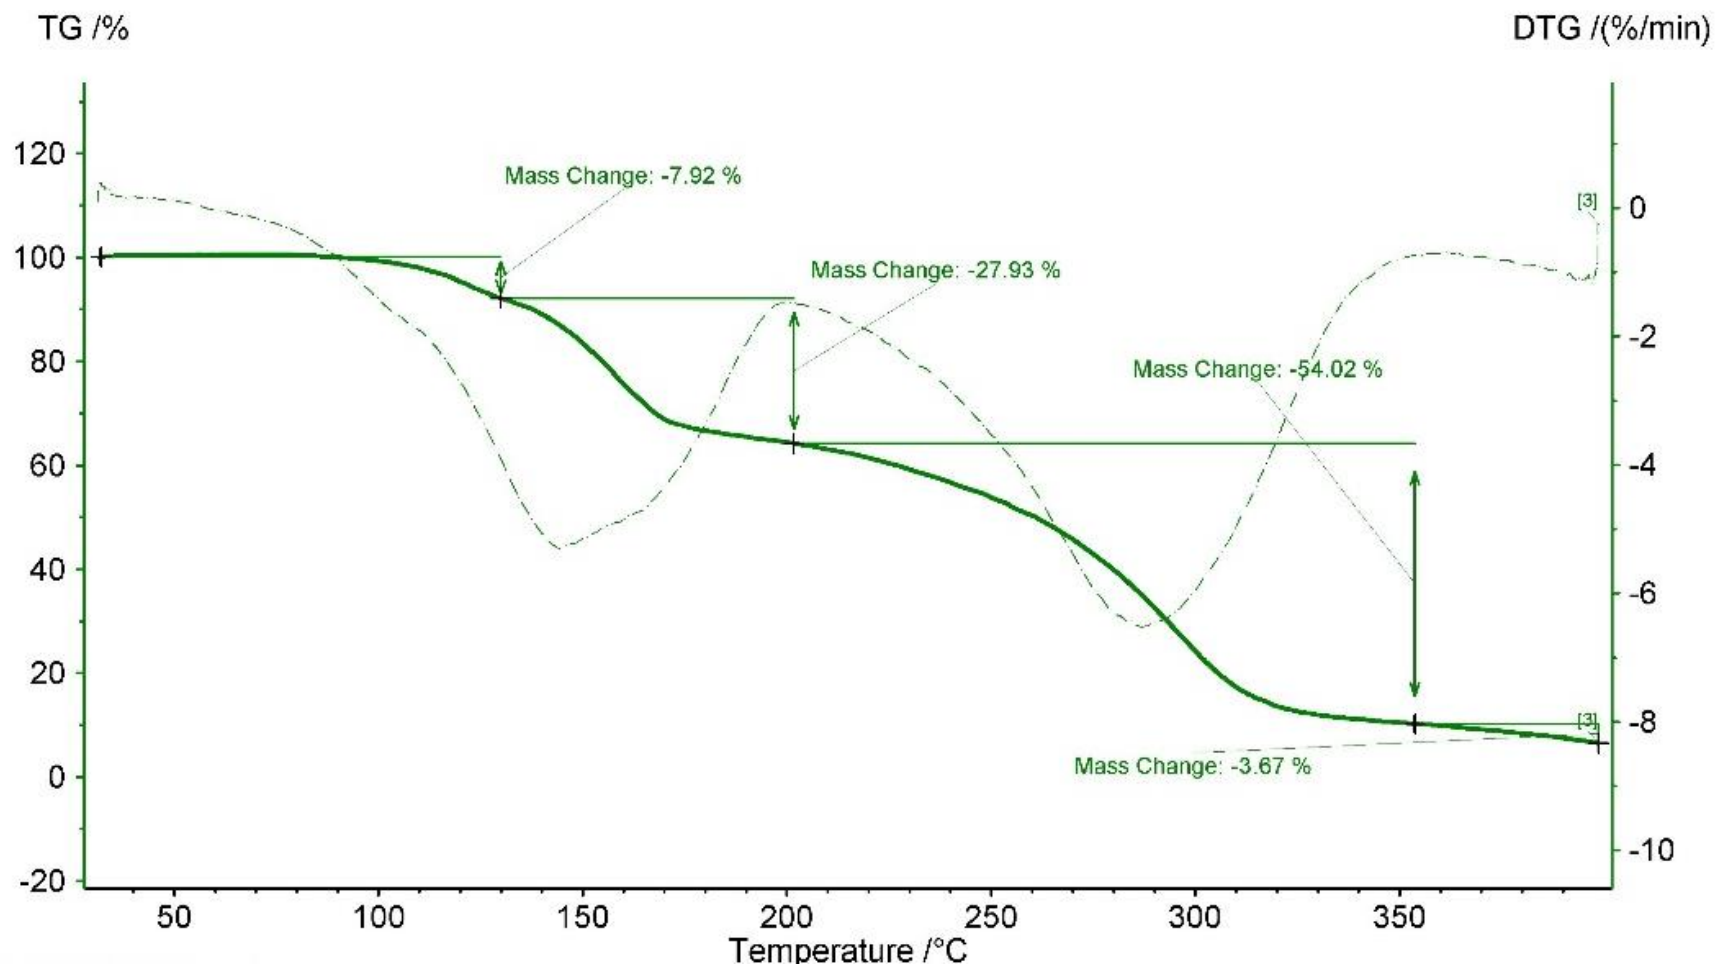

Figure S5. TGA diagram for compound 2.

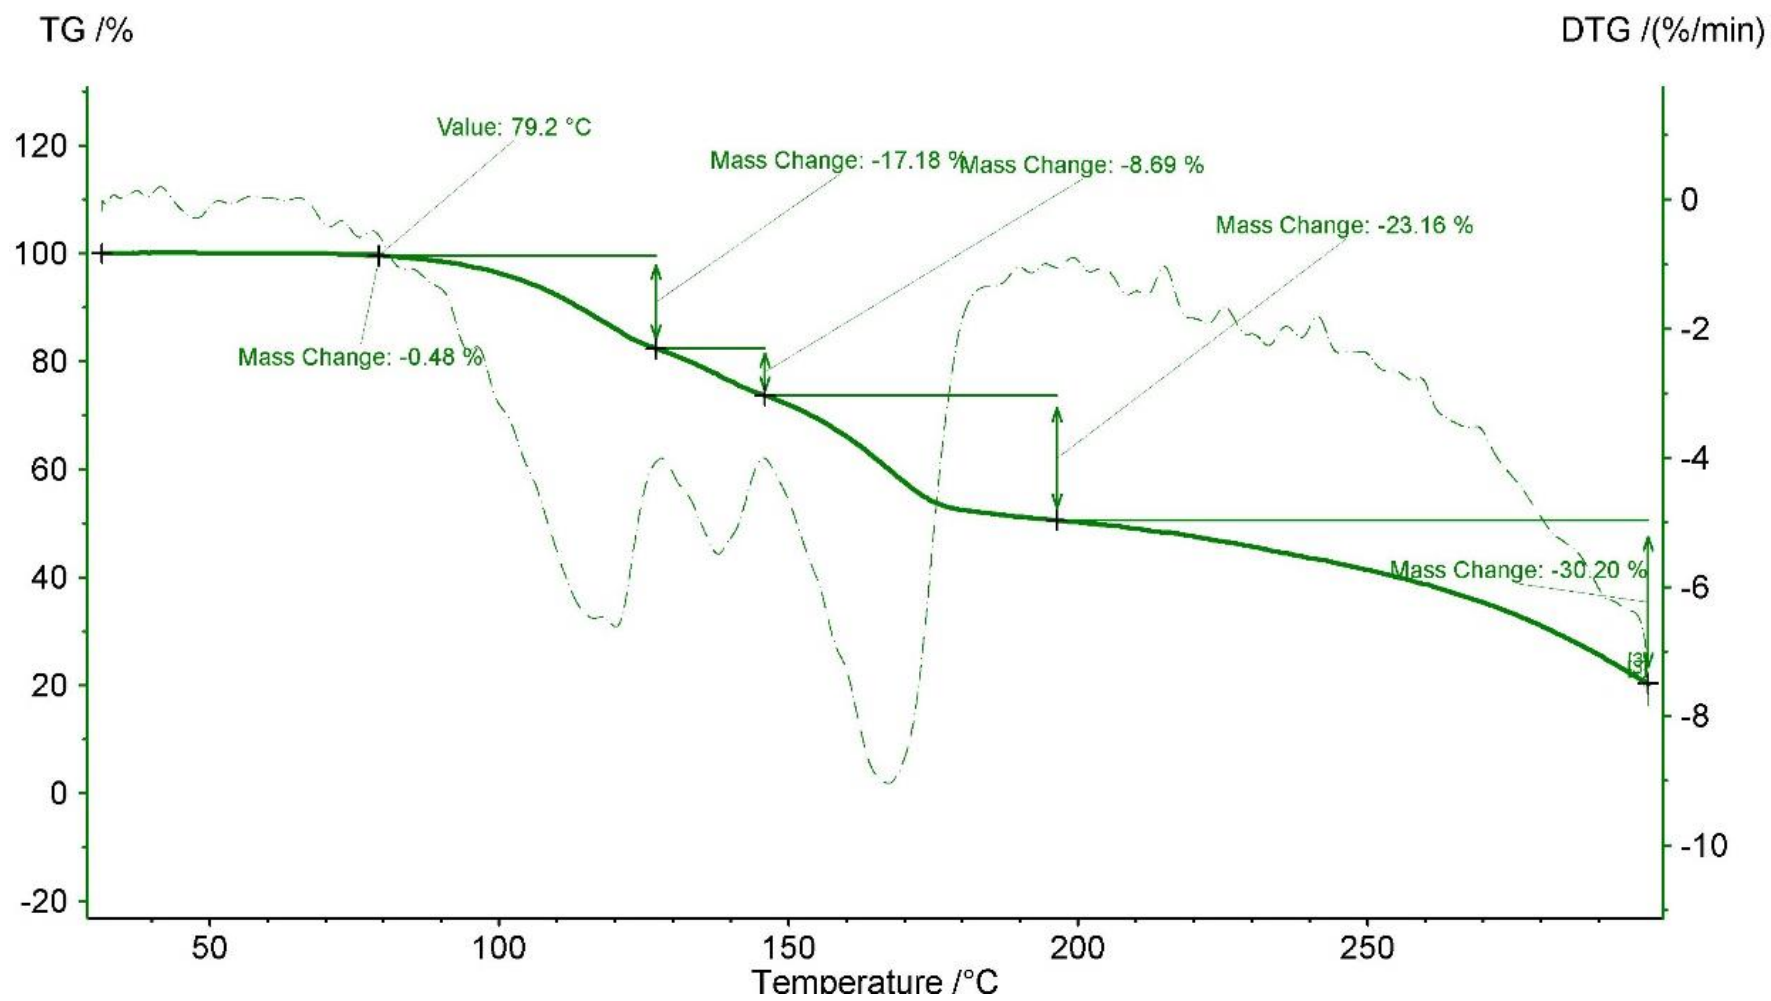

Figure S6. TGA diagram for compound 3.

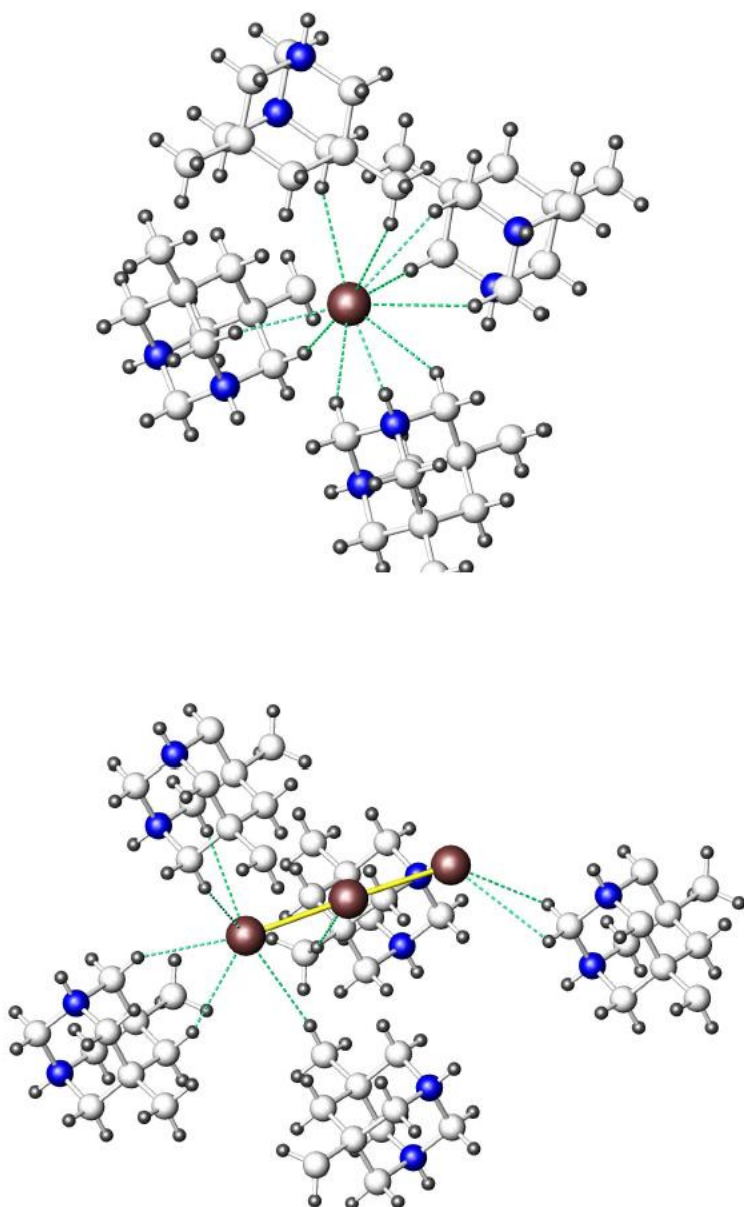

**Figure S7.** Surrounding of the guest I<sup>-</sup> anions in the crystal structure of **1** (top) and of I<sub>3</sub><sup>-</sup> anions in the crystal structure of **2** (bottom). Iodine, brown; nitrogen, blue; carbon, light grey; hydrogen, dark grey. Hydrogen (C)H...I bonds are shown by dashed green lines.

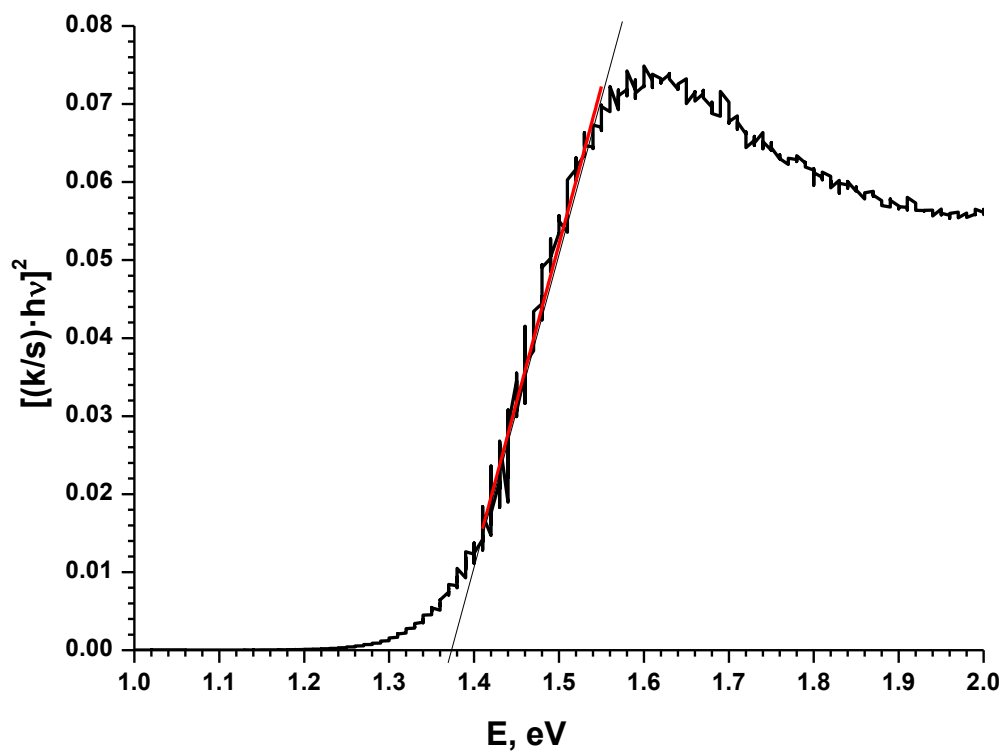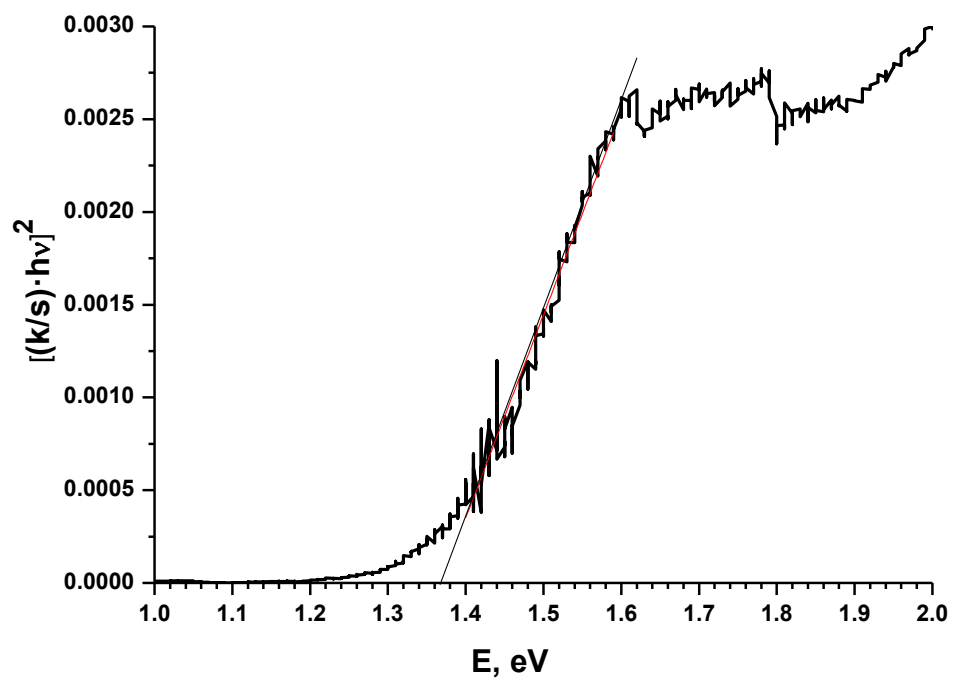

**Figure S8.** Kubelka-Munk plots for compounds **2** (top) and **3** (bottom).

## References:

1. Quast, H.; Muller, B.; Peters, E.-M.; Peters, K.; von Schnering, H.G., Kristall- und Molekülstruktur von Tetraaryl-3,7-diazabicyclo-[3.3.1]nonanen und Tetra- und Pentaaryl-1,3-diaza-adamantanen. Sessel/Boot-Konformation der Tetraaryl-3,7-diazabicyclo[3.3.1]nonane. *Chem. Ber.* **1982**, *115*, 3631-3652.
2. Krishnakumar, R.V.; Nandhini, M. Subha; Vijayakumar, V.; Natarajan, S.; Sundaravadivelu, M.; Perumal, S.; Mostad, A., 4,8,9,10-Tetra-kis-(4-chloro-phenyl)-1,3-di-aza-adamantan-6-one. *Acta Crystallogr., Sect. E* **2001**, *57*, o860-o862.
3. Natarajan, S.; Priya, V. S.; Vijayakumar, V.; Suresh, J.; Lakshman, P. L. N., 4,8,9,10-Tetra-kis(4-fluoro-phen-yl)-1,3-di-aza-tri-cyclo-[3.3.1.1]decan-6-one. *Acta Crystallogr., Sect. E* **2009**, *65*, o1530.
4. Kuppers, H.; Samhammer, A.; Haller, R., Structure of di-methyl 6-hydroxy-8,9-bis-(2-pyridyl)-1,3-di-aza-5,7-adamantanedi-carboxylate. *Acta Crystallogr., Sect. C* **1987**, *43*, 1974-1976.
5. Subha Nandhini, M.; Krishnakumar, R. V.; Narasimhamurthy, T.; Vijayakumar, V.; Sundaravadivelu, M.; Natarajan, S., 4,8,9,10-Tetra-phenyl-1,3-di-aza-adamantan-6-one acetone hemisolvate. *Acta Crystallogr., Sect. E* **2002**, *58*, o1210- o1212.
6. Natarajan, S.; Uthayasankari, K.; Satish Goud, K. E.; Gangadurai, C.; Vijayakumar, V.; Suresh, J., Crystal structure of 4,8,9,10-tetrapheny-1,3-diazaadamantane. *Anal. Sci.: X-Ray Struct. Anal. Online* 2008, *24*, 249.
7. Nandhini, M. S.; Krishnakumar, R. V.; Narasimhamurthy, T.; Vijayakumar, V.; Sundaravadivelu, M.; Natarajan, S., Hexa-methyl-ene-tetra-mine-4-nitro-catechol-water (1/2/1). *Acta Crystallogr., Sect. E* **2002**, *58*, o675-o677.
8. Krishnakumar, R. V.; Vijayakumar, V.; Sundaravadivelu, M.; Natarajan, S.; Perumal, S.; Selvaraj, S., 4,8,9,10-Tetra-kis-(4-meth-oxy-phenyl)-1,3-di-aza-adamantan-6-one benzene solvate. *Acta Crystallogr., Sect. E* **2001**, *57*, o305-o306.
9. Medvedko, A. V.; Dalinger, A. I.; Nuriev, V. N.; Semashko, V. S.; Filatov, A. V.; Ezhov, A. A.; Churakov, A. V.; Howard, J. A. K.; Shiryayev, A. A.; Baranchikov, A. E.; Ivanov, V. K.; Vatsadze, S. Z., Supramolecular Organogels Based on N-Benzyl, N'-Acylbispidinols. *Nanomaterials* **2019**, *9*, 89.
10. Birnbaum, G. I.; Cheung, K. K.; Wiewiorowski, M.; Bratek-Wiewiorowska, M. D., Structure and chemistry of the perchlorate of anhydro-N-hydroxymethyldeoxyangustifoline. *J. Chem. Soc. B* **1967**, 1368-1374.

11. McCabe, P. H.; Milne, N. J.; Sim, G. A., Structure of the hydrogensulfate salt of a di-azaadamantanone, 5,7-di-phenyl-1,3-di-azatri-cyclo[3.3.1.1<sup>3,7</sup>]decane-6-one. *Acta Crystallogr., Sect. C* **1989**, *45*, 114-116.
12. Cui, H.; Goddard, R.; Porschke, K.-R., Degradation of Dichloromethane by Bispidine. *J. Phys. Org. Chem.* **2012**, *25*, 814-827.
13. Goncharov, A. V.; Panov, V. N.; Maleyev, A. V.; Potekhin, K. A.; Kurkutova, Ye. N.; Struchkov, Yu. T.; Palyulin, V. A.; Zefirov, N. S., Crystal and Molecular Structures of 1-azonia-3-azaadamantanes *Dokl. Akad. Nauk SSSR (Russ.) (Proc. Nat. Acad. Sci. USSR)* **1991**, *318*, 907.
14. Kurkutova, E. N.; Goncharov, A. V.; Ilyukhin, V. V.; Belov, N. V., Molecular structure of 1-methyl-5,7-diphenyl-1,3-diazaadamantan-6-one iodide *Koord. Khim. (Russ.) (Coord. Chem.)*, **1977**, *3*, 268.
15. Fernandez, M. J.; Galvez, E.; Lorente, A.; Camunas, J. A.; Sanz, J.; Fonseca, I., Synthesis, Structural and Conformational Study of 6 - hydroxy (or acyloxy) Derivatives of the 1,3 - dimethyl - 1,3 - diazoniatricyclo[3.3.1.1<sup>3,7</sup>]decane System. *J. Heterocycl. Chem.* **1990**, *27*, 1355-1359.
